# Supplementary material for: Evidence of microplastics in water and commercial fish from a high-altitude mountain lake (Lake Titicaca)
Source: PeerJ. 2022 Nov 9;10:e14112. doi: 10.7717/peerj.14112 (PMC9653051; doi:10.7717/peerj.14112)
Supplement: Supplemental Information 1 — The count of microplastics found in the gut contents analysis of the fishery resources evaluated; the counts of microplastics found in the water samples; and the subsamples of microplastics found for measurement. [file peerj-10-14112-s001.xlsx]

## Sheet: GEOData
Sample	Site	Stacion	Longitude	Latitude
Water	CENTRAL ISLANDS	1	-68.7485	-16.3077
Water	CENTRAL ISLANDS	2	-68.7348	-16.3091
Water	CENTRAL ISLANDS	3	-68.6756	-16.2781
Water	DESAGUADERO	1	-69.0148	-16.5567
Water	DESAGUADERO	2	-69.0103	-16.5482
Water	DESAGUADERO	3	-68.9932	-16.5234
Water	HUATAJATA	1	-68.6941	-16.2128
Water	HUATAJATA	2	-68.6869	-16.2167
Water	HUATAJATA	3	-68.6797	-16.2461
Water	SAN JOSE	1	-68.9554	-16.4725
Water	SAN JOSE	2	-68.9647	-16.4775
Water	SAN JOSE	3	-68.979	-16.4877
Water	NACOCA	1	-68.923	-16.4325
Water	NACOCA	2	-68.9206	-16.428
Water	NACOCA	3	-68.9186	-16.4155
Fish	DESAGUADERO	No Station	-69.0103	-16.5482
Fish	HUARINA	No Station	-68.6156	-16.2042
Fish	CACHILAYA	No Station	-68.5913	-16.3129

## Sheet: MPinGut
Site	Species	N	N empty stomach	N with content	N with plastic	FO
Cachilaya	O. luteus	100	13	87	5	5.7
Cachilaya	O. agassizii	97	2	95	5	5.2
Cachilaya	T. dispar	139	38	101	8	5.8
Cachilaya	O. bonariensis	122	8	114	1	0.8
Desaguadero	O. luteus	46	1	45	0	0
Desaguadero	O. agassizii	163	16	147	2	1.2
Desaguadero	O. bonariensis	59	0	59	0	0
Huarina	O. luteus	202	37	165	7	3.5
Huarina	O. agassizii	147	15	132	12	8.2
Huarina	T. dispar	148	8	140	1	0.7
Huarina	O. bonariensis	61	8	53	3	4.9

## Sheet: MPcounting
CODE	SAMPLING CAMPAIGN	SITE	STATION	DATE	SAMPLE	WATER COLLECTED (L)	FIBER	FRAGMENT	MPtotal	[MP/L]	Fiber per L	Fragments per L
1DE1S	1	DESAGUADERO	1	13/7/2021	SURFACE	5	142	265	407	81.4	28.4	53
1DE2S	1	DESAGUADERO	2	13/7/2021	SURFACE	5	192	410	602	120.4	38.4	82
1DE3S	1	DESAGUADERO	3	13/7/2021	SURFACE	5	93	445	538	107.6	18.6	89
1HU1S	1	HUATAJATA	1	8/7/2021	SURFACE	5	ND	ND	ND	ND	ND	ND
1HU2S	1	HUATAJATA	2	8/7/2021	SURFACE	5	102	76	178	35.6	20.4	15.2
1HU3S	1	HUATAJATA	3	8/7/2021	SURFACE	5	48	134	182	36.4	9.6	26.8
1CI2	1	ISLAS CENTRALES	1	9/7/2021	SURFACE	5	382	15	397	79.4	76.4	3
1CI2S	1	ISLAS CENTRALES	2	9/7/2021	SURFACE	5	186	244	430	86	37.2	48.8
1CI3S	1	ISLAS CENTRALES	3	9/7/2021	SURFACE	5	44	12	56	11.2	8.8	2.4
1NA1S	1	NACOCA	1	21/8/2021	SURFACE	5	95	55	150	30	19	11
1NA2S	1	NACOCA	2	21/8/2021	SURFACE	5	41	76	117	23.4	8.2	15.2
1NA3S	1	NACOCA	3	21/8/2021	SURFACE	5	79	13	92	18.4	15.8	2.6
1SJ1S	1	SAN JOSE	1	20/8/2021	SURFACE	5	ND	ND	ND	ND	ND	ND
1SJ2S	1	SAN JOSE	2	20/8/2021	SURFACE	5	37	27	64	12.8	7.4	5.4
1SJ3S	1	SAN JOSE	3	20/8/2021	SURFACE	5	114	68	407	36.4	22.8	13.6

## Sheet: MPlength
COD	SITE	TYPE	COLOR	NUMBER	LONGITUDE (µm)
1CI3S	CENTRAL ISLANDS	FIBER	BLUE	1	247.01
1CI3S	CENTRAL ISLANDS	FIBER	BLUE	2	24.9
1CI3S	CENTRAL ISLANDS	FIBER	BLUE	3	730.06
1CI3S	CENTRAL ISLANDS	FIBER	BLUE	4	1110.65
1CI3S	CENTRAL ISLANDS	FIBER	BLUE	5	656.85
1CI3S	CENTRAL ISLANDS	FIBER	BLUE	6	132.66
1CI3S	CENTRAL ISLANDS	FIBER	BLUE	7	482.75
1CI3S	CENTRAL ISLANDS	FIBER	BLUE	8	924.29
1CI3S	CENTRAL ISLANDS	FIBER	BLUE	9	889.69
1CI3S	CENTRAL ISLANDS	FIBER	BLUE	10	721.36
1CI3S	CENTRAL ISLANDS	FIBER	BLUE	11	227.26
1CI3S	CENTRAL ISLANDS	FIBER	BLUE	12	163.71
1CI3S	CENTRAL ISLANDS	FIBER	BLUE	13	302.01
1CI3S	CENTRAL ISLANDS	FIBER	BLUE	14	2756.92
1CI3S	CENTRAL ISLANDS	FIBER	BLUE	15	131.7
1CI3S	CENTRAL ISLANDS	FRAGMENT	BLUE	1	28.34
1CI3S	CENTRAL ISLANDS	FRAGMENT	BLUE	2	43.18
1CI3S	CENTRAL ISLANDS	FRAGMENT	BLUE	3	36.54
1CI3S	CENTRAL ISLANDS	FRAGMENT	BLUE	4	147.26
1CI3S	CENTRAL ISLANDS	FRAGMENT	BLUE	5	277.37
1CI3S	CENTRAL ISLANDS	FRAGMENT	BLACK	6	631.33
1CI3S	CENTRAL ISLANDS	FRAGMENT	BLUE	7	52.02
1CI3S	CENTRAL ISLANDS	FRAGMENT	BLUE	8	314.49
1CI3S	CENTRAL ISLANDS	FRAGMENT	BLUE	9	827.93
1CI3S	CENTRAL ISLANDS	FRAGMENT	BLUE	10	264.9
1CI3S	CENTRAL ISLANDS	FRAGMENT	BLUE	11	383.22
1CI3S	CENTRAL ISLANDS	FIBER	RED	1	828.86
1CI3S	CENTRAL ISLANDS	FIBER	RED	2	238.23
1CI3S	CENTRAL ISLANDS	FIBER	RED	3	189.41
1CI3S	CENTRAL ISLANDS	FIBER	RED	4	998.62
1CI3S	CENTRAL ISLANDS	FIBER	RED	5	414.65
1CI3S	CENTRAL ISLANDS	FIBER	RED	6	269.33
1CI3S	CENTRAL ISLANDS	FIBER	RED	7	409.78
1CI3S	CENTRAL ISLANDS	FIBER	RED	8	441.32
1HU3S	HUATAJATA	FIBER	BLUE	1	758.09
1HU3S	HUATAJATA	FIBER	BLUE	2	30.54
1HU3S	HUATAJATA	FIBER	BLUE	3	63.74
1HU3S	HUATAJATA	FIBER	BLUE	4	519.57
1HU3S	HUATAJATA	FIBER	BLUE	5	792.91
1HU3S	HUATAJATA	FIBER	BLUE	6	559.03
1HU3S	HUATAJATA	FIBER	BLUE	7	910.69
1HU3S	HUATAJATA	FIBER	BLUE	8	593.07
1HU3S	HUATAJATA	FIBER	BLUE	9	704.64
1HU3S	HUATAJATA	FIBER	BLUE	10	226.95
1HU3S	HUATAJATA	FIBER	BLUE	11	669.47
1HU3S	HUATAJATA	FIBER	BLUE	12	167.6
1HU3S	HUATAJATA	FIBER	BLUE	13	294.11
1HU3S	HUATAJATA	FIBER	BLUE	14	281.69
1HU3S	HUATAJATA	FIBER	BLUE	15	137.75
1HU3S	HUATAJATA	FRAGMENT	BLUE	1	16.27
1HU3S	HUATAJATA	FRAGMENT	BLUE	2	127.93
1HU3S	HUATAJATA	FRAGMENT	BLUE	3	24.31
1HU3S	HUATAJATA	FRAGMENT	BLUE	4	82.84
1HU3S	HUATAJATA	FRAGMENT	BLUE	5	29.96
1HU3S	HUATAJATA	FRAGMENT	BLUE	6	6.76
1HU3S	HUATAJATA	FRAGMENT	BLUE	7	13.68
1HU3S	HUATAJATA	FRAGMENT	BLUE	8	75.1
1HU3S	HUATAJATA	FRAGMENT	BLUE	9	42.3
1HU3S	HUATAJATA	FRAGMENT	BLUE	10	73.15
1HU3S	HUATAJATA	FRAGMENT	BLUE	11	68.84
1HU3S	HUATAJATA	FRAGMENT	BLUE	12	30.75
1HU3S	HUATAJATA	FRAGMENT	BLUE	13	16.75
1HU3S	HUATAJATA	FRAGMENT	BLUE	14	19.31
1HU3S	HUATAJATA	FRAGMENT	BLUE	15	22.9
1CI2S	CENTRAL ISLANDS	FIBER	BLUE	1	19.97
1CI2S	CENTRAL ISLANDS	FIBER	BLUE	2	995.17
1CI2S	CENTRAL ISLANDS	FIBER	BLUE	3	101.54
1CI2S	CENTRAL ISLANDS	FIBER	BLUE	4	1293.16
1CI2S	CENTRAL ISLANDS	FIBER	BLUE	5	42.99
1CI2S	CENTRAL ISLANDS	FIBER	BLUE	6	599.61
1CI2S	CENTRAL ISLANDS	FIBER	BLUE	7	1096.48
1CI2S	CENTRAL ISLANDS	FIBER	BLUE	8	969.01
1CI2S	CENTRAL ISLANDS	FIBER	BLUE	9	506.14
1CI2S	CENTRAL ISLANDS	FIBER	BLUE	10	26.07
1CI2S	CENTRAL ISLANDS	FIBER	BLUE	11	150.05
1CI2S	CENTRAL ISLANDS	FIBER	BLUE	12	116.53
1CI2S	CENTRAL ISLANDS	FIBER	BLUE	13	340.13
1CI2S	CENTRAL ISLANDS	FIBER	BLUE	14	64.51
1CI2S	CENTRAL ISLANDS	FIBER	BLUE	15	269.51
1CI2S	CENTRAL ISLANDS	FRAGMENT	BLUE	1	19.64
1CI2S	CENTRAL ISLANDS	FRAGMENT	BLUE	2	21.23
1CI2S	CENTRAL ISLANDS	FRAGMENT	BLUE	3	22.3
1CI2S	CENTRAL ISLANDS	FRAGMENT	BLUE	4	9.56
1CI2S	CENTRAL ISLANDS	FRAGMENT	BLUE	5	55.55
1CI2S	CENTRAL ISLANDS	FRAGMENT	BLUE	6	11.57
1CI2S	CENTRAL ISLANDS	FRAGMENT	BLUE	7	10.16
1CI2S	CENTRAL ISLANDS	FRAGMENT	BLUE	8	14.56
1CI2S	CENTRAL ISLANDS	FRAGMENT	BLUE	9	10.81
1CI2S	CENTRAL ISLANDS	FRAGMENT	BLUE	10	8.05
1CI2S	CENTRAL ISLANDS	FRAGMENT	BLUE	11	44.35
1CI2S	CENTRAL ISLANDS	FRAGMENT	BLUE	12	29.64
1CI2S	CENTRAL ISLANDS	FRAGMENT	BLUE	13	13.84
1CI2S	CENTRAL ISLANDS	FRAGMENT	BLUE	14	20.16
1CI2S	CENTRAL ISLANDS	FRAGMENT	BLUE	15	11.91
1CI2S	CENTRAL ISLANDS	FRAGMENT	BLUE	16	46.73
1CI2S	CENTRAL ISLANDS	FRAGMENT	BLUE	17	629.69
1CI2S	CENTRAL ISLANDS	FRAGMENT	BLUE	18	186.04
1CI2S	CENTRAL ISLANDS	FIBER	RED	1	2737.19
1CI2S	CENTRAL ISLANDS	FIBER	RED	2	261.66
1CI2S	CENTRAL ISLANDS	FIBER	RED	3	853.6
1CI2S	CENTRAL ISLANDS	FIBER	RED	4	1210.04
1CI2S	CENTRAL ISLANDS	FIBER	RED	5	430.69
1CI2S	CENTRAL ISLANDS	FIBER	RED	6	235.66
1CI2S	CENTRAL ISLANDS	FIBER	RED	7	190.26
1CI2S	CENTRAL ISLANDS	FIBER	RED	8	978.05
1CI2S	CENTRAL ISLANDS	FIBER	RED	9	1346.15
1CI2S	CENTRAL ISLANDS	FIBER	RED	10	1077.87
1CI2S	CENTRAL ISLANDS	FIBER	RED	11	61.94
1CI2S	CENTRAL ISLANDS	FIBER	RED	12	665.75
1CI2S	CENTRAL ISLANDS	FIBER	RED	13	225.79
1CI2S	CENTRAL ISLANDS	FIBER	RED	14	1122.76
1HU2S	HUATAJATA	FIBER	BLUE	1	606.28
1HU2S	HUATAJATA	FIBER	BLUE	2	96.68
1HU2S	HUATAJATA	FIBER	BLUE	3	435.07
1HU2S	HUATAJATA	FIBER	BLUE	4	1304.56
1HU2S	HUATAJATA	FIBER	BLUE	5	158.82
1HU2S	HUATAJATA	FIBER	BLUE	6	61.01
1HU2S	HUATAJATA	FIBER	BLUE	7	427.72
1HU2S	HUATAJATA	FIBER	BLUE	8	456.88
1HU2S	HUATAJATA	FIBER	BLUE	9	499.79
1HU2S	HUATAJATA	FIBER	BLUE	10	368.23
1HU2S	HUATAJATA	FIBER	BLUE	11	322.84
1HU2S	HUATAJATA	FIBER	BLUE	12	624.44
1HU2S	HUATAJATA	FIBER	BLUE	13	1992.72
1HU2S	HUATAJATA	FIBER	BLUE	14	112.63
1HU2S	HUATAJATA	FIBER	BLUE	15	1138.9
1HU2S	HUATAJATA	FRAGMENT	BLUE	1	9.12
1HU2S	HUATAJATA	FRAGMENT	BLUE	2	16.55
1HU2S	HUATAJATA	FRAGMENT	BLUE	3	6.7
1HU2S	HUATAJATA	FRAGMENT	BLUE	4	12.04
1HU2S	HUATAJATA	FRAGMENT	BLUE	5	68.44
1HU2S	HUATAJATA	FRAGMENT	BLUE	6	25.74
1HU2S	HUATAJATA	FRAGMENT	BLUE	7	18.95
1HU2S	HUATAJATA	FRAGMENT	BLUE	8	22.48
1HU2S	HUATAJATA	FRAGMENT	BLUE	9	25.43
1HU2S	HUATAJATA	FRAGMENT	BLUE	10	295.2
1HU2S	HUATAJATA	FRAGMENT	BLUE	11	35.59
1HU2S	HUATAJATA	FRAGMENT	BLUE	12	110.85
1HU2S	HUATAJATA	FRAGMENT	BLUE	13	35.6
1HU2S	HUATAJATA	FRAGMENT	BLUE	14	133.9
1HU2S	HUATAJATA	FRAGMENT	BLUE	15	112.54
1HU2S	HUATAJATA	FIBER	RED	1	869.1
1HU2S	HUATAJATA	FIBER	RED	2	1304.93
1HU2S	HUATAJATA	FIBER	RED	3	576.61
1HU2S	HUATAJATA	FIBER	RED	4	686.65
1HU2S	HUATAJATA	FIBER	RED	5	178.52
1HU2S	HUATAJATA	FIBER	RED	6	1172.42
1HU2S	HUATAJATA	FIBER	RED	7	312.75
1HU2S	HUATAJATA	FIBER	RED	8	361.06
1HU2S	HUATAJATA	FIBER	RED	9	938.9
1HU2S	HUATAJATA	FIBER	RED	10	274.04
1HU2S	HUATAJATA	FIBER	RED	11	249.57
1HU2S	HUATAJATA	FIBER	RED	12	600.38
1HU2S	HUATAJATA	FIBER	RED	13	384.85
1HU2S	HUATAJATA	FIBER	RED	14	508.58
1HU2S	HUATAJATA	FIBER	RED	15	664.29
1DE3S	DESAGUADERO	FIBER	BLUE	1	713
1DE3S	DESAGUADERO	FIBER	BLUE	2	25.66
1DE3S	DESAGUADERO	FIBER	BLUE	3	540.5
1DE3S	DESAGUADERO	FIBER	BLUE	4	1188.94
1DE3S	DESAGUADERO	FIBER	BLUE	5	167.94
1DE3S	DESAGUADERO	FIBER	BLUE	6	122.34
1DE3S	DESAGUADERO	FIBER	BLUE	7	411.67
1DE3S	DESAGUADERO	FIBER	BLUE	8	318.78
1DE3S	DESAGUADERO	FIBER	BLUE	9	413.24
1DE3S	DESAGUADERO	FIBER	BLUE	10	127.08
1DE3S	DESAGUADERO	FIBER	BLUE	11	397
1DE3S	DESAGUADERO	FIBER	BLUE	12	350.72
1DE3S	DESAGUADERO	FIBER	BLUE	13	411.72
1DE3S	DESAGUADERO	FIBER	BLUE	14	43.93
1DE3S	DESAGUADERO	FIBER	BLUE	15	27.85
1DE3S	DESAGUADERO	FIBER	BLUE	16	410.82
1DE3S	DESAGUADERO	FRAGMENT	BLUE	1	83.75
1DE3S	DESAGUADERO	FRAGMENT	BLUE	2	14.97
1DE3S	DESAGUADERO	FRAGMENT	BLUE	3	23.07
1DE3S	DESAGUADERO	FRAGMENT	BLUE	4	9.73
1DE3S	DESAGUADERO	FRAGMENT	BLUE	5	46.43
1DE3S	DESAGUADERO	FRAGMENT	BLUE	6	8.65
1DE3S	DESAGUADERO	FRAGMENT	BLUE	7	5.8
1DE3S	DESAGUADERO	FRAGMENT	BLUE	8	5.76
1DE3S	DESAGUADERO	FRAGMENT	BLUE	9	6.88
1DE3S	DESAGUADERO	FRAGMENT	BLUE	10	50.07
1DE3S	DESAGUADERO	FRAGMENT	BLUE	11	11.78
1DE3S	DESAGUADERO	FRAGMENT	BLUE	12	99.07
1DE3S	DESAGUADERO	FRAGMENT	BLUE	13	49.61
1DE3S	DESAGUADERO	FRAGMENT	RED	14	135.12
1DE3S	DESAGUADERO	FRAGMENT	BLUE	15	15.1
1DE3S	DESAGUADERO	FRAGMENT	BLUE	16	49.35
1DE3S	DESAGUADERO	FRAGMENT	BLUE	17	18.1
1DE3S	DESAGUADERO	FRAGMENT	RED	18	98.51
1DE3S	DESAGUADERO	FRAGMENT	RED	19	77.41
1DE3S	DESAGUADERO	FRAGMENT	BLUE	20	20.31
1DE3S	DESAGUADERO	FIBER	RED	1	1096.69
1DE3S	DESAGUADERO	FIBER	RED	2	589.61
1DE3S	DESAGUADERO	FIBER	RED	3	331.35
1DE3S	DESAGUADERO	FIBER	RED	4	677.35
1DE3S	DESAGUADERO	FIBER	RED	5	558.93
1DE3S	DESAGUADERO	FIBER	RED	6	367.25
1DE3S	DESAGUADERO	FIBER	RED	7	425.99
1DE3S	DESAGUADERO	FIBER	RED	8	458.91
1DE3S	DESAGUADERO	FIBER	RED	9	390.6
1DE1S	DESAGUADERO	FIBER	BLUE	1	52.83
1DE1S	DESAGUADERO	FIBER	BLUE	2	46.01
1DE1S	DESAGUADERO	FIBER	BLUE	3	24.23
1DE1S	DESAGUADERO	FIBER	BLUE	4	375.34
1DE1S	DESAGUADERO	FIBER	BLUE	5	546.33
1DE1S	DESAGUADERO	FIBER	BLUE	6	657.45
1DE1S	DESAGUADERO	FIBER	BLUE	7	954.62
1DE1S	DESAGUADERO	FIBER	BLUE	8	236.51
1DE1S	DESAGUADERO	FIBER	BLUE	9	368.33
1DE1S	DESAGUADERO	FIBER	BLUE	10	57.34
1DE1S	DESAGUADERO	FIBER	BLUE	11	217.35
1DE1S	DESAGUADERO	FIBER	BLUE	12	472.04
1DE1S	DESAGUADERO	FIBER	BLUE	13	111.43
1DE1S	DESAGUADERO	FIBER	BLUE	14	1081.73
1DE1S	DESAGUADERO	FIBER	BLUE	15	70.57
1DE1S	DESAGUADERO	FRAGMENT	BLUE	1	31.84
1DE1S	DESAGUADERO	FRAGMENT	BLUE	2	38.73
1DE1S	DESAGUADERO	FRAGMENT	BLUE	3	23.79
1DE1S	DESAGUADERO	FRAGMENT	BLUE	4	10.54
1DE1S	DESAGUADERO	FRAGMENT	BLUE	5	39.12
1DE1S	DESAGUADERO	FRAGMENT	BLUE	6	5.99
1DE1S	DESAGUADERO	FRAGMENT	BLUE	7	17.1
1DE1S	DESAGUADERO	FRAGMENT	BLUE	8	21.03
1DE1S	DESAGUADERO	FRAGMENT	BLUE	9	20.68
1DE1S	DESAGUADERO	FRAGMENT	BLUE	10	26.8
1DE1S	DESAGUADERO	FRAGMENT	BLUE	11	817.76
1DE1S	DESAGUADERO	FRAGMENT	BLUE	12	43.23
1DE1S	DESAGUADERO	FRAGMENT	BLUE	13	27.01
1DE1S	DESAGUADERO	FRAGMENT	BLUE	14	75.64
1DE1S	DESAGUADERO	FRAGMENT	BLUE	15	28.56
1DE1S	DESAGUADERO	FIBER	RED	1	393.23
1DE1S	DESAGUADERO	FIBER	RED	2	324.7
1DE1S	DESAGUADERO	FIBER	RED	3	2102.58
1DE1S	DESAGUADERO	FIBER	RED	4	401.68
1DE1S	DESAGUADERO	FIBER	RED	5	421.5
1DE1S	DESAGUADERO	FIBER	RED	6	1826.87
1DE1S	DESAGUADERO	FIBER	RED	7	645.17
1DE1S	DESAGUADERO	FIBER	RED	8	270.38
1DE1S	DESAGUADERO	FIBER	RED	9	1458.18
1DE1S	DESAGUADERO	FIBER	RED	10	1629.73
1DE2S	DESAGUADERO	FIBER	BLUE	1	167.33
1DE2S	DESAGUADERO	FIBER	BLUE	2	278.62
1DE2S	DESAGUADERO	FIBER	BLUE	3	281.87
1DE2S	DESAGUADERO	FIBER	BLUE	4	33.19
1DE2S	DESAGUADERO	FIBER	BLUE	5	358.06
1DE2S	DESAGUADERO	FIBER	BLUE	6	277.3
1DE2S	DESAGUADERO	FIBER	BLUE	7	930.86
1DE2S	DESAGUADERO	FIBER	BLUE	8	208.41
1DE2S	DESAGUADERO	FIBER	BLUE	9	1260.76
1DE2S	DESAGUADERO	FIBER	BLUE	10	234.72
1DE2S	DESAGUADERO	FIBER	BLUE	11	98.1
1DE2S	DESAGUADERO	FIBER	BLUE	12	329.47
1DE2S	DESAGUADERO	FIBER	BLUE	13	1283.57
1DE2S	DESAGUADERO	FIBER	BLUE	14	628.25
1DE2S	DESAGUADERO	FIBER	BLUE	15	1395.41
1DE2S	DESAGUADERO	FRAGMENT	BLUE	1	36.51
1DE2S	DESAGUADERO	FRAGMENT	BLUE	2	32.24
1DE2S	DESAGUADERO	FRAGMENT	BLUE	3	76.99
1DE2S	DESAGUADERO	FRAGMENT	BLUE	4	50.2
1DE2S	DESAGUADERO	FRAGMENT	BLUE	5	37.03
1DE2S	DESAGUADERO	FRAGMENT	BLUE	6	39.67
1DE2S	DESAGUADERO	FRAGMENT	BLUE	7	33.28
1DE2S	DESAGUADERO	FRAGMENT	BLUE	8	57.02
1DE2S	DESAGUADERO	FRAGMENT	BLUE	9	39.19
1DE2S	DESAGUADERO	FRAGMENT	BLUE	10	37.02
1DE2S	DESAGUADERO	FRAGMENT	BLUE	11	21.99
1DE2S	DESAGUADERO	FRAGMENT	BLUE	12	54.21
1DE2S	DESAGUADERO	FRAGMENT	BLUE	13	23.36
1DE2S	DESAGUADERO	FRAGMENT	BLUE	14	28.26
1DE2S	DESAGUADERO	FRAGMENT	BLUE	15	86.37
1DE2S	DESAGUADERO	FRAGMENT	BLUE	16	24.35
1DE2S	DESAGUADERO	FIBER	RED	1	493.37
1DE2S	DESAGUADERO	FIBER	RED	2	642.41
1DE2S	DESAGUADERO	FIBER	RED	3	514.89
1DE2S	DESAGUADERO	FIBER	RED	4	395.11
1DE2S	DESAGUADERO	FIBER	RED	5	481.86
1DE2S	DESAGUADERO	FIBER	RED	6	713.68
1DE2S	DESAGUADERO	FIBER	RED	7	577.39
1DE2S	DESAGUADERO	FIBER	RED	8	124.18
1DE2S	DESAGUADERO	FIBER	RED	9	296.56
1DE2S	DESAGUADERO	FIBER	RED	10	868.91
1DE2S	DESAGUADERO	FIBER	RED	11	782.3
1DE2S	DESAGUADERO	FIBER	RED	12	211.38
1DE2S	DESAGUADERO	FIBER	RED	13	629.3
1DE2S	DESAGUADERO	FIBER	RED	14	448.08
1DE2S	DESAGUADERO	FIBER	RED	15	160.26
1CI2	CENTRAL ISLANDS	FIBER	BLUE	1	583.37
1CI2	CENTRAL ISLANDS	FIBER	BLUE	2	2440.36
1CI2	CENTRAL ISLANDS	FIBER	BLUE	3	548.14
1CI2	CENTRAL ISLANDS	FIBER	BLUE	4	510.58
1CI2	CENTRAL ISLANDS	FIBER	BLUE	5	624.82
1CI2	CENTRAL ISLANDS	FIBER	BLUE	6	1132.04
1CI2	CENTRAL ISLANDS	FIBER	BLUE	7	192.94
1CI2	CENTRAL ISLANDS	FIBER	BLUE	8	601.33
1CI2	CENTRAL ISLANDS	FIBER	BLUE	9	228.32
1CI2	CENTRAL ISLANDS	FIBER	BLUE	10	1080.95
1CI2	CENTRAL ISLANDS	FIBER	BLUE	11	461.86
1CI2	CENTRAL ISLANDS	FIBER	BLUE	12	1308.04
1CI2	CENTRAL ISLANDS	FIBER	BLUE	13	92.92
1CI2	CENTRAL ISLANDS	FIBER	BLUE	14	629.71
1CI2	CENTRAL ISLANDS	FIBER	BLUE	15	623.8
1CI2	CENTRAL ISLANDS	FRAGMENT	BLUE	1	25.07
1CI2	CENTRAL ISLANDS	FRAGMENT	BLUE	2	33.02
1CI2	CENTRAL ISLANDS	FRAGMENT	BLUE	3	20.29
1CI2	CENTRAL ISLANDS	FRAGMENT	BLUE	4	48.26
1CI2	CENTRAL ISLANDS	FRAGMENT	BLUE	5	65.37
1CI2	CENTRAL ISLANDS	FRAGMENT	BLUE	6	49.5
1CI2	CENTRAL ISLANDS	FRAGMENT	BLUE	7	21.59
1CI2	CENTRAL ISLANDS	FRAGMENT	BLUE	8	12.9
1CI2	CENTRAL ISLANDS	FRAGMENT	BLUE	9	12.1
1CI2	CENTRAL ISLANDS	FRAGMENT	BLUE	10	120.06
1CI2	CENTRAL ISLANDS	FRAGMENT	BLUE	11	58.45
1CI2	CENTRAL ISLANDS	FRAGMENT	BLUE	12	52.86
1CI2	CENTRAL ISLANDS	FRAGMENT	BLUE	13	141.39
1CI2	CENTRAL ISLANDS	FRAGMENT	BLUE	14	33.61
1CI2	CENTRAL ISLANDS	FRAGMENT	BLUE	15	118.34
1CI2	CENTRAL ISLANDS	FRAGMENT	BLUE	16	301.3
1CI2	CENTRAL ISLANDS	FIBER	RED	1	388.91
1CI2	CENTRAL ISLANDS	FIBER	RED	2	388.46
1CI2	CENTRAL ISLANDS	FIBER	RED	3	396.38
1CI2	CENTRAL ISLANDS	FIBER	RED	4	818.46
1CI2	CENTRAL ISLANDS	FIBER	RED	5	380.29
1CI2	CENTRAL ISLANDS	FIBER	RED	6	1428.7
1CI2	CENTRAL ISLANDS	FIBER	RED	7	347.41
1CI2	CENTRAL ISLANDS	FIBER	RED	8	2140.92
1CI2	CENTRAL ISLANDS	FIBER	RED	9	409.74
1NA1S	NACOCA	FIBER	BLUE	1	600.54
1NA1S	NACOCA	FIBER	BLUE	2	313.13
1NA1S	NACOCA	FIBER	BLUE	3	157.77
1NA1S	NACOCA	FIBER	BLUE	4	319.29
1NA1S	NACOCA	FIBER	BLUE	5	1369.9
1NA1S	NACOCA	FIBER	BLUE	6	497.22
1NA1S	NACOCA	FIBER	BLUE	7	331.93
1NA1S	NACOCA	FIBER	BLUE	8	997.58
1NA1S	NACOCA	FIBER	BLUE	9	1049.65
1NA1S	NACOCA	FIBER	BLUE	10	1070.99
1NA1S	NACOCA	FIBER	BLUE	11	83.23
1NA1S	NACOCA	FIBER	BLUE	12	222.61
1NA1S	NACOCA	FIBER	BLUE	13	276.11
1NA1S	NACOCA	FIBER	BLUE	14	289.08
1NA1S	NACOCA	FIBER	BLUE	15	226.64
1NA1S	NACOCA	FRAGMENT	BLUE	1	115.16
1NA1S	NACOCA	FRAGMENT	BLUE	2	72.44
1NA1S	NACOCA	FRAGMENT	BLUE	3	98.7
1NA1S	NACOCA	FRAGMENT	BLUE	4	284.27
1NA1S	NACOCA	FRAGMENT	MIX (red and blue)	5	188.59
1NA1S	NACOCA	FRAGMENT	BLUE	6	149.2
1NA1S	NACOCA	FRAGMENT	BLUE	7	52.01
1NA1S	NACOCA	FRAGMENT	BLUE	8	117.21
1NA1S	NACOCA	FRAGMENT	BLUE	9	162.58
1NA1S	NACOCA	FRAGMENT	MIX (red and blue)	10	133.19
1NA1S	NACOCA	FRAGMENT	BLUE	11	28.88
1NA1S	NACOCA	FRAGMENT	BLUE	12	74.44
1NA1S	NACOCA	FRAGMENT	RED	13	124.36
1NA1S	NACOCA	FRAGMENT	BLUE	14	43.92
1NA1S	NACOCA	FRAGMENT	BLUE	15	29.65
1NA1S	NACOCA	FRAGMENT	RED	16	80.42
1NA1S	NACOCA	FRAGMENT	MIX (red and blue)	17	43.71
1NA1S	NACOCA	FIBER	RED	1	970.64
1NA1S	NACOCA	FIBER	RED	2	572.12
1NA1S	NACOCA	FIBER	RED	3	292.52
1NA1S	NACOCA	FIBER	RED	4	1071.02
1NA1S	NACOCA	FIBER	RED	5	1688.25
1NA1S	NACOCA	FIBER	RED	6	443.15
1NA1S	NACOCA	FIBER	RED	7	428.22
1NA1S	NACOCA	FIBER	RED	8	350.47
1NA2S	NACOCA	FIBER	BLUE	1	28.87
1NA2S	NACOCA	FIBER	BLUE	2	45
1NA2S	NACOCA	FIBER	BLUE	3	42.49
1NA2S	NACOCA	FIBER	BLUE	4	115.73
1NA2S	NACOCA	FIBER	BLUE	5	1428.04
1NA2S	NACOCA	FIBER	BLUE	6	23.46
1NA2S	NACOCA	FIBER	BLUE	7	300.38
1NA2S	NACOCA	FIBER	BLUE	8	467.7
1NA2S	NACOCA	FIBER	BLUE	9	91.4
1NA2S	NACOCA	FIBER	BLUE	10	33.93
1NA2S	NACOCA	FIBER	BLUE	11	1008
1NA2S	NACOCA	FIBER	BLUE	12	355.37
1NA2S	NACOCA	FIBER	BLUE	13	96.67
1NA2S	NACOCA	FIBER	BLUE	14	458.79
1NA2S	NACOCA	FIBER	BLUE	15	456.98
1NA2S	NACOCA	FIBER	BLUE	16	869.28
1NA2S	NACOCA	FIBER	BLUE	17	411.53
1NA2S	NACOCA	FIBER	BLUE	18	1532.29
1NA2S	NACOCA	FRAGMENT	BLUE	1	401.14
1NA2S	NACOCA	FRAGMENT	BLUE	2	45.4
1NA2S	NACOCA	FRAGMENT	BLUE	3	61.61
1NA2S	NACOCA	FRAGMENT	BLUE	4	13.36
1NA2S	NACOCA	FRAGMENT	BLUE	5	20.66
1NA2S	NACOCA	FRAGMENT	BLUE	6	13
1NA2S	NACOCA	FRAGMENT	BLUE	7	15.14
1NA2S	NACOCA	FRAGMENT	BLUE	8	13.84
1NA2S	NACOCA	FRAGMENT	BLUE	9	59.22
1NA2S	NACOCA	FRAGMENT	BLUE	10	47.32
1NA2S	NACOCA	FRAGMENT	BLUE	11	44.51
1NA2S	NACOCA	FRAGMENT	RED	12	339.8
1NA2S	NACOCA	FRAGMENT	BLUE	13	40.92
1NA2S	NACOCA	FRAGMENT	BLUE	14	46.8
1NA2S	NACOCA	FRAGMENT	RED	15	23.05
1NA2S	NACOCA	FIBER	RED	1	573.16
1NA2S	NACOCA	FIBER	RED	2	409.95
1NA2S	NACOCA	FIBER	RED	3	664.18
1NA2S	NACOCA	FIBER	RED	4	133.85
1NA2S	NACOCA	FIBER	RED	5	75.13
1NA2S	NACOCA	FIBER	RED	6	446.6
1NA2S	NACOCA	FIBER	RED	7	1714.07
1NA2S	NACOCA	FIBER	RED	8	314.73
1NA2S	NACOCA	FIBER	RED	9	372.4
1NA2S	NACOCA	FIBER	RED	10	414.75
1NA3S	NACOCA	FIBER	BLUE	1	605.7
1NA3S	NACOCA	FIBER	BLUE	2	376.32
1NA3S	NACOCA	FIBER	BLUE	3	507.82
1NA3S	NACOCA	FIBER	BLUE	4	397.79
1NA3S	NACOCA	FIBER	BLUE	5	448.84
1NA3S	NACOCA	FIBER	BLUE	6	641.18
1NA3S	NACOCA	FIBER	BLUE	7	668.11
1NA3S	NACOCA	FIBER	BLUE	8	384.2
1NA3S	NACOCA	FIBER	BLUE	9	577.27
1NA3S	NACOCA	FIBER	BLUE	10	163.79
1NA3S	NACOCA	FIBER	BLUE	11	1446.38
1NA3S	NACOCA	FIBER	BLUE	12	245.97
1NA3S	NACOCA	FIBER	BLUE	13	220.83
1NA3S	NACOCA	FIBER	BLUE	14	1091.78
1NA3S	NACOCA	FIBER	BLUE	15	709.34
1NA3S	NACOCA	FRAGMENT	BLUE	1	85.99
1NA3S	NACOCA	FRAGMENT	RED	2	196.44
1NA3S	NACOCA	FRAGMENT	RED	3	81.5
1NA3S	NACOCA	FRAGMENT	RED	4	106.43
1NA3S	NACOCA	FRAGMENT	BLUE	5	144.66
1NA3S	NACOCA	FRAGMENT	RED	6	35.59
1NA3S	NACOCA	FRAGMENT	RED	7	149
1NA3S	NACOCA	FRAGMENT	BLUE	8	186.64
1NA3S	NACOCA	FRAGMENT	BLUE	9	98.15
1NA3S	NACOCA	FRAGMENT	BLUE	10	81.21
1NA3S	NACOCA	FRAGMENT	RED	11	124.79
1NA3S	NACOCA	FRAGMENT	BLUE	12	187.78
1NA3S	NACOCA	FRAGMENT	BLUE	13	44.26
1NA3S	NACOCA	FRAGMENT	BLUE	14	52.42
1NA3S	NACOCA	FRAGMENT	BLUE	15	50.99
1NA3S	NACOCA	FIBER	RED	1	408.77
1NA3S	NACOCA	FIBER	RED	2	969.33
1NA3S	NACOCA	FIBER	RED	3	113.33
1NA3S	NACOCA	FIBER	RED	4	510.52
1NA3S	NACOCA	FIBER	RED	5	420.2
1NA3S	NACOCA	FIBER	RED	6	335.08
1NA3S	NACOCA	FIBER	RED	7	586.01
1NA3S	NACOCA	FIBER	RED	8	501.6
1NA3S	NACOCA	FIBER	RED	9	462.86
1NA3S	NACOCA	FIBER	RED	10	884.74
1NA3S	NACOCA	FIBER	RED	11	613.96
1NA3S	NACOCA	FIBER	RED	12	409.45
1NA3S	NACOCA	FIBER	RED	13	332.51
1SJ2S	SAN JOSE	FIBER	BLUE	1	888.24
1SJ2S	SAN JOSE	FIBER	BLUE	2	233.47
1SJ2S	SAN JOSE	FIBER	BLUE	3	231.45
1SJ2S	SAN JOSE	FIBER	BLUE	4	692.73
1SJ2S	SAN JOSE	FIBER	BLUE	5	370.78
1SJ2S	SAN JOSE	FIBER	BLUE	6	541.11
1SJ2S	SAN JOSE	FIBER	BLUE	7	141.9
1SJ2S	SAN JOSE	FIBER	BLUE	8	1653.92
1SJ2S	SAN JOSE	FIBER	BLUE	9	478.74
1SJ2S	SAN JOSE	FIBER	BLUE	10	66.25
1SJ2S	SAN JOSE	FIBER	BLUE	11	488.43
1SJ2S	SAN JOSE	FIBER	BLUE	12	991.13
1SJ2S	SAN JOSE	FIBER	BLUE	13	589.55
1SJ2S	SAN JOSE	FRAGMENT	BLUE	1	14.17
1SJ2S	SAN JOSE	FRAGMENT	BLUE	2	8.32
1SJ2S	SAN JOSE	FRAGMENT	BLUE	3	37.26
1SJ2S	SAN JOSE	FRAGMENT	RED	4	359.97
1SJ2S	SAN JOSE	FRAGMENT	BLUE	5	22.1
1SJ2S	SAN JOSE	FRAGMENT	BLUE	6	24.45
1SJ2S	SAN JOSE	FRAGMENT	BLUE	7	35.22
1SJ2S	SAN JOSE	FRAGMENT	BLUE	8	27.01
1SJ2S	SAN JOSE	FRAGMENT	BLUE	9	71.13
1SJ2S	SAN JOSE	FRAGMENT	RED	10	213.13
1SJ2S	SAN JOSE	FRAGMENT	RED	11	29.85
1SJ2S	SAN JOSE	FRAGMENT	BLUE	12	14.97
1SJ2S	SAN JOSE	FRAGMENT	RED	13	45.61
1SJ2S	SAN JOSE	FRAGMENT	BLUE	14	86.37
1SJ2S	SAN JOSE	FRAGMENT	BLUE	15	178.23
1SJ2S	SAN JOSE	FRAGMENT	BLUE	16	59.37
1SJ2S	SAN JOSE	FIBER	RED	1	10.91
1SJ2S	SAN JOSE	FIBER	RED	2	482.9
1SJ2S	SAN JOSE	FIBER	RED	3	398.95
1SJ2S	SAN JOSE	FIBER	RED	4	1847.21
1SJ2S	SAN JOSE	FIBER	RED	5	1429.91
1SJ2S	SAN JOSE	FIBER	RED	6	1104.52
1SJ2S	SAN JOSE	FIBER	RED	7	428.86
1SJ2S	SAN JOSE	FIBER	RED	8	213.69
1SJ2S	SAN JOSE	FIBER	RED	9	2018.56
1SJ2S	SAN JOSE	FIBER	RED	10	215.37
1SJ2S	SAN JOSE	FIBER	RED	11	1471.37
1SJ2S	SAN JOSE	FIBER	RED	12	234.96
1SJ2S	SAN JOSE	FIBER	RED	13	1042.84
1SJ2S	SAN JOSE	FIBER	RED	14	262.18
1SJ2S	SAN JOSE	FIBER	RED	15	1958.7
1SJ3S	SAN JOSE	FIBER	BLUE	1	206.96
1SJ3S	SAN JOSE	FIBER	BLUE	2	10.42
1SJ3S	SAN JOSE	FIBER	BLUE	3	24.3
1SJ3S	SAN JOSE	FIBER	BLUE	4	5.63
1SJ3S	SAN JOSE	FIBER	BLUE	5	9.97
1SJ3S	SAN JOSE	FIBER	BLUE	6	48.42
1SJ3S	SAN JOSE	FIBER	BLUE	7	14.79
1SJ3S	SAN JOSE	FIBER	BLUE	8	34.85
1SJ3S	SAN JOSE	FIBER	BLUE	9	15.99
1SJ3S	SAN JOSE	FIBER	BLUE	10	19.46
1SJ3S	SAN JOSE	FIBER	BLUE	11	17.56
1SJ3S	SAN JOSE	FIBER	BLUE	12	13.6
1SJ3S	SAN JOSE	FIBER	BLUE	13	22.83
1SJ3S	SAN JOSE	FIBER	BLUE	14	22.5
1SJ3S	SAN JOSE	FIBER	BLUE	15	29.21
1SJ3S	SAN JOSE	FRAGMENT	BLUE	1	31.09
1SJ3S	SAN JOSE	FRAGMENT	BLUE	2	14
1SJ3S	SAN JOSE	FRAGMENT	BLUE	3	19.2
1SJ3S	SAN JOSE	FRAGMENT	BLUE	4	14.28
1SJ3S	SAN JOSE	FRAGMENT	BLUE	5	7.54
1SJ3S	SAN JOSE	FRAGMENT	BLUE	6	21.76
1SJ3S	SAN JOSE	FRAGMENT	BLUE	7	71.75
1SJ3S	SAN JOSE	FRAGMENT	BLUE	8	187.17
1SJ3S	SAN JOSE	FRAGMENT	BLUE	9	394.65
1SJ3S	SAN JOSE	FRAGMENT	BLUE	10	8.88
1SJ3S	SAN JOSE	FRAGMENT	BLUE	11	2.15
1SJ3S	SAN JOSE	FRAGMENT	BLUE	12	24.43
1SJ3S	SAN JOSE	FRAGMENT	BLUE	13	50.88
1SJ3S	SAN JOSE	FRAGMENT	BLUE	14	143.49
1SJ3S	SAN JOSE	FRAGMENT	BLUE	15	20.18
1SJ3S	SAN JOSE	FRAGMENT	BLUE	16	1249.34
1SJ3S	SAN JOSE	FIBER	RED	1	173.76
1SJ3S	SAN JOSE	FIBER	RED	2	81.64
1SJ3S	SAN JOSE	FIBER	RED	3	48.52
1SJ3S	SAN JOSE	FIBER	RED	4	24.12
1SJ3S	SAN JOSE	FIBER	RED	5	18.91
1SJ3S	SAN JOSE	FIBER	RED	6	14.57
1SJ3S	SAN JOSE	FIBER	RED	7	33.61
1SJ3S	SAN JOSE	FIBER	RED	8	73.68
1SJ3S	SAN JOSE	FIBER	RED	9	40.24
1SJ3S	SAN JOSE	FIBER	RED	10	140.77
1SJ3S	SAN JOSE	FIBER	RED	11	19
1SJ3S	SAN JOSE	FIBER	RED	12	21.31
1SJ3S	SAN JOSE	FIBER	RED	13	21.02
1SJ3S	SAN JOSE	FIBER	RED	14	163.96
1SJ3S	SAN JOSE	FIBER	RED	15	49.64
